# Supplementary material for: Right-handed and left-handed G-quadruplexes have the same DNA sequence: distinct conformations induced by an organic small molecule and potassium
Source: Royal Society of Chemistry journal article supplement (doi:10.1039/c6cc04866h), 2016-01-01
Supplement: c6cc04866h1.pdf [file c6cc04866h1.pdf]

## Supporting Information

### Right-handed and left-handed G-quadruplexes from the same DNA sequence : distinct conformations induced by organic small molecule and potassium

Boshi Fu<sup>a</sup>, Jinguo Huang<sup>a</sup>, Yuqi Chen<sup>a</sup>, Yafen Wang<sup>a</sup>, Tianrui Xue<sup>a</sup>, GuoHua Xu<sup>b</sup>, Shaoru Wang<sup>\*a</sup>, Xiang Zhou<sup>\*a</sup>

<sup>a</sup> † College of Chemistry and Molecular Sciences, Key Laboratory of Biomedical Polymers of Ministry of Education, Wuhan University, Wuhan, Hubei, 430072, P. R. of China.

<sup>b</sup> † Wuhan Institute of Physics and Mathematics, Chinese Academy of Sciences, Wuhan 430071, Hubei, China

**Materials Methods and Instrumentation.** The following solvents, compounds and reagents were commercially available: p-Aminophenol, phenol was bought from SCRC (Shanghai, China). 2-Piperidinoethylchloridehydrochloride was bought from Aladdin (Beijing, China). Methyl iodide, KCl and other organic solvent were bought from SCRC (Shanghai, China). All stock and buffer solutions were prepared using water purified with the RU Water Purification System (Millipore, Billerica, MA, USA). <sup>1</sup>H and <sup>13</sup>C NMR spectra were recorded on Varian Mercury 300 spectrometers, respectively. API-ES were recorded on Agilent LC/MS 6120B (Agilent, USA).

**The Synthesis of Razo.** Compound Razo was prepared by the literature methods reported in our previous research<sup>1</sup>.

**Circular Dichroic Studies.** The circular dichroism spectra were collected on Chirascan<sup>TM</sup> CD spectroscopy (Applied Photophysics, Leatherhead, United Kingdom). CD spectra from 220 to 350 nm were collected and scanning speed was 200 nm/min. The bandwidth was 5 nm. The response time was 2 s. Baseline-corrected was carried out to avoid the signal contributions due to the buffer after scanning. Every sample ran at least two times. All scanning was processed at ambient temperature unless otherwise specified.

**Thermodynamic Melting Studies.** For the Z-G4 study, a solution of AS-M (10 μM) was prepared in 100 K<sup>+</sup> mM. And the B-G4 solution contain 10 μM AS-M and 50μM Razo. The *trans*-conformation of Razo was affirmed by the NMR (figure S1). The CD absorbance was monitored on a Chirascan<sup>TM</sup> CD spectroscopy (Applied Photophysics, Leatherhead, United Kingdom) equipped with a temperature controller. The temperature was increased from 4 to 90 °C and the speed is about 0.5–1.5 °C/min. The



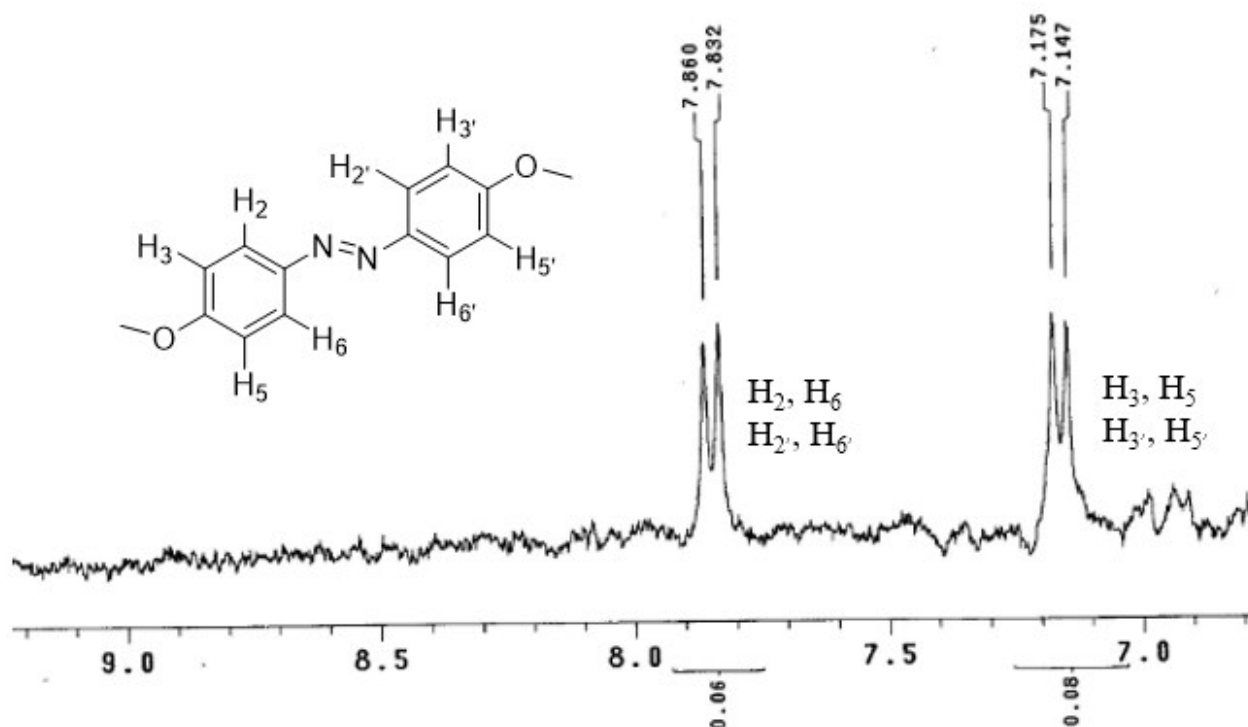

**Figure S1.**  $^1\text{H}$  NMR spectra of 5mM in 10%  $\text{H}_2\text{O}/90\%$   $\text{D}_2\text{O}$  solution. The chemical shift of  $\text{H}_6/\text{H}_6'$  and  $\text{H}_5/\text{H}_5'$  indicated there is long distance with two kinds of hydrogen. That means the Razo in the *trans*conformation.

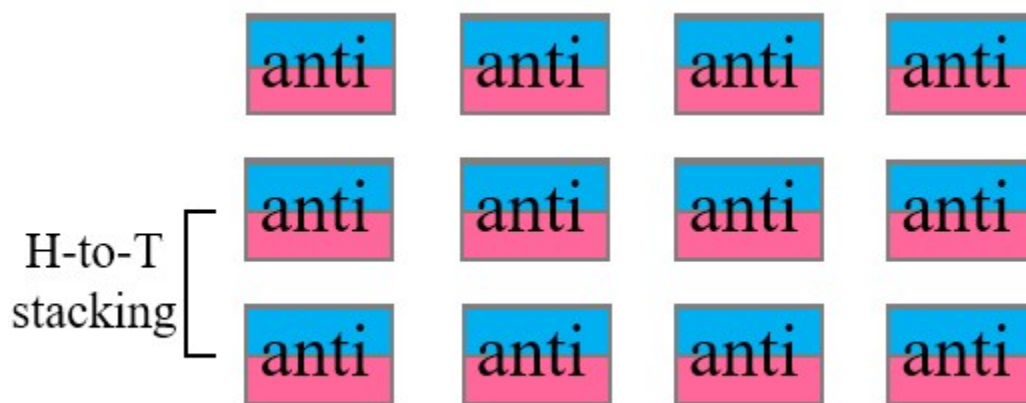

**Figure S2.** The sketch of the stacking arrangement of the G-quadruplex from T95-2T<sup>3</sup>.

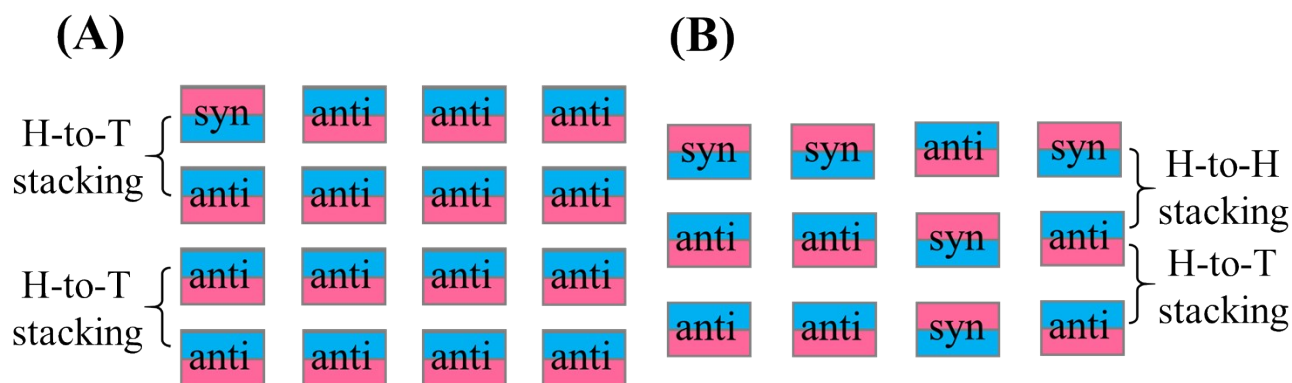

**Figure S3** (A) The sketch of the stacking arrangement of G-quartets in Z-G4 induced by  $K^+$ . (B) A sketch of the stacking arrangement of G-quartets in Z-G4 induced by Razo. The conformation contained both homopolarity stacking (H-to-T) and heteropolarity stacking (H-to-H), which meant that the G-quartet polarity also alternated

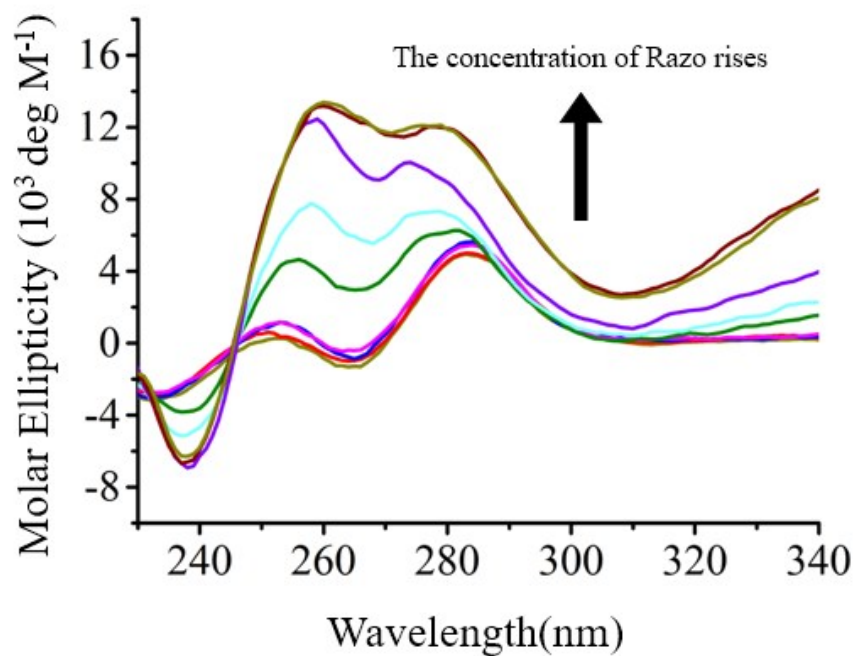

**Figure S4.** The Circular dichroism spectra of titration between AS-M and Razo.  
 (AS-M =  $10\mu\text{M}$ , Razo =  $0\mu\text{M}$ ,  $1\mu\text{M}$ ,  $3\mu\text{M}$ ,  $5\mu\text{M}$ ,  $10\mu\text{M}$ ,  $30\mu\text{M}$ ,  $50\mu\text{M}$ ,  $100\mu\text{M}$ ,  $500\mu\text{M}$ )

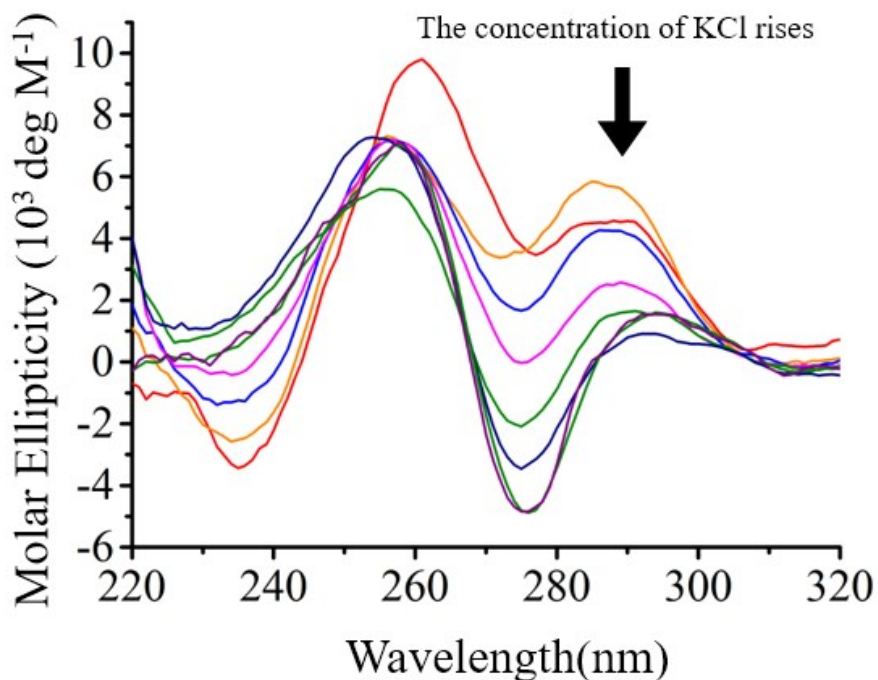

**Figure S5.** The Circular dichroism spectra of titration between AS-M and KCl.

(AS-M = 10  $\mu$ M, KCl = 0  $\mu$ M, 1mM, 5mM, 10mM, 30mM, 50mM, 100mM, 500mM)

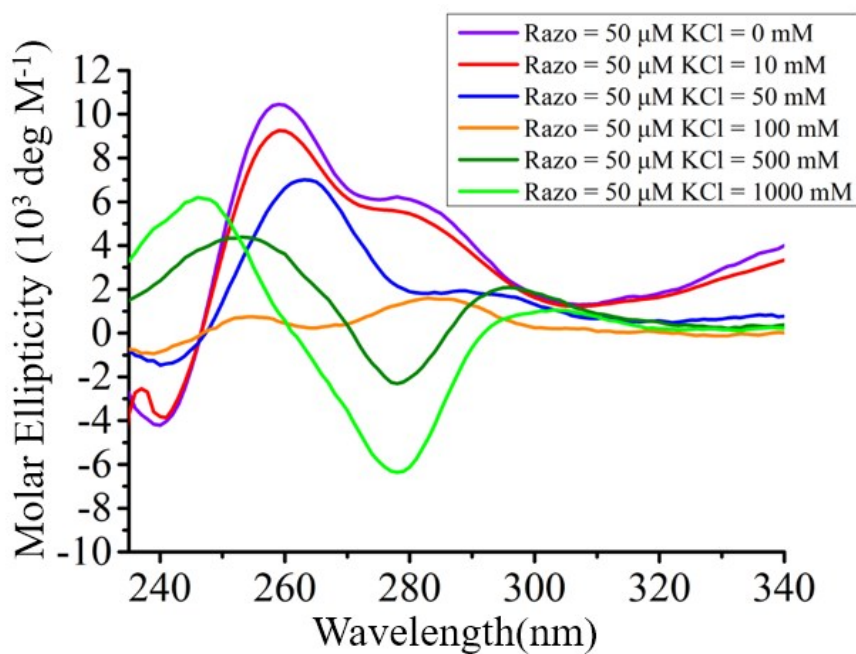

**Figure S6.** The Circular dichroism spectra of the competition titration. The initiating structure of AS-M (The concentration of AS-M = 10  $\mu$ M) is the left-handed formation in the present of 100mM K<sup>+</sup>.

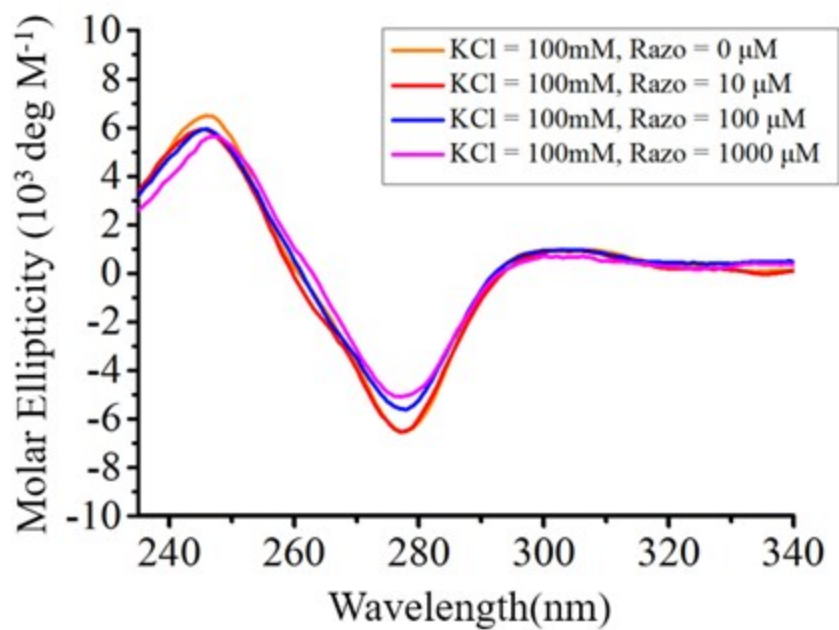

**Figure S7.** The Circular dichroism spectra of the competition titration. The initiating structure of AS-M (The concentration of AS-M =  $10\mu\text{M}$ ) is the right-handed formation in the present of  $100\mu\text{M}$  Razo.

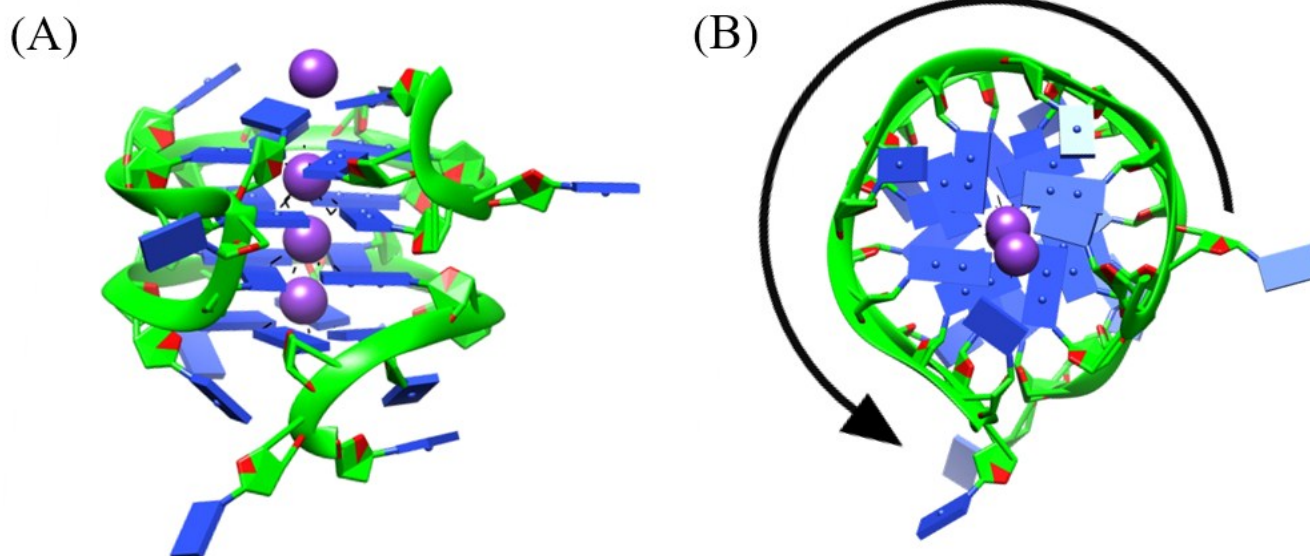

**Figure S8.** The crystal structure of left-handed G-quadruplex. (PDB: 4U5M<sup>2</sup>) (A) Mainview. (B) Topview.

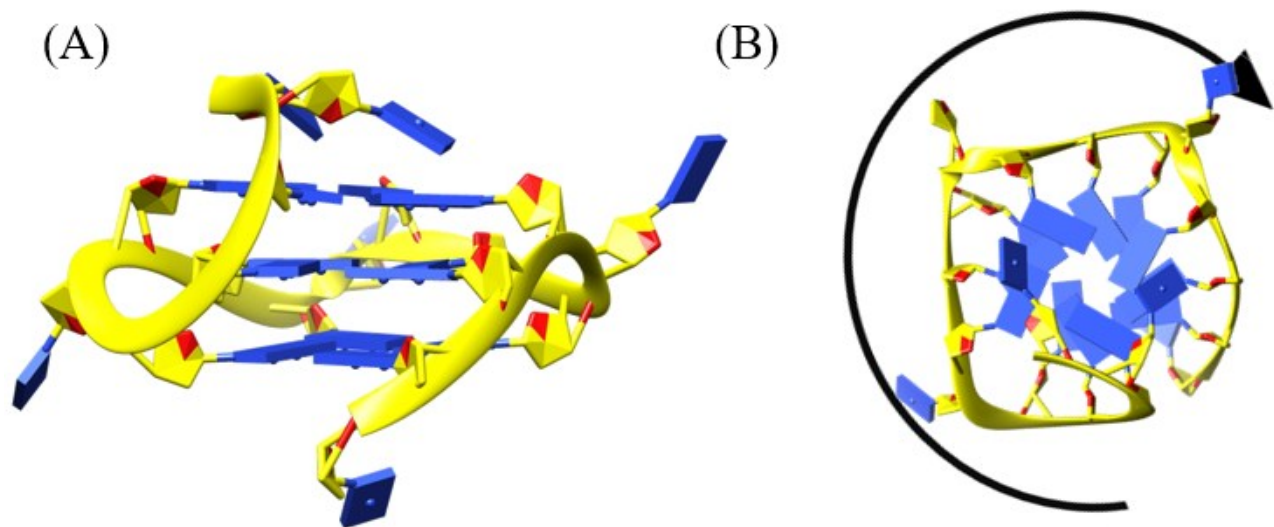

**Figure S9** The crystal structure of right-handed G-quadruplex from T95-2T. (PDB: 2lk7<sup>3</sup>) (A) Mainview. (B) Topview.

## Reference

1. X. L. Wang, J. Huang, Y. Y. Zhou, S. Y. Yan, X.C. Weng, X. J. Wu, M. G. Deng, X. Zhou, *Angew. Chem. Int. Ed.*, 2010, **49**, 5305
2. N. Q. Do, A. T. Phan, *Chem. Eur. J.*, 2012, **18**, 14752.
3. W. J. Chung, B. Heddi, E. Schmitt, K. W. Lim, Y. Mechulam, A. T. Phan, *Proc. Natl. Acad. Sci. U. S. A.*, 2015, **112**, 2729.
4. J. D. McGhee, D.H. von Hippel, *J. Mol. Biol.*, 1974, **86**, 496.
5. E. F. Pettersen, T. D. Goddard, C. C. Huang, G. S. Couch, D. M. Greenblatt, E. C. Meng, T. E. Ferrin, *J. Comput. Chem.*, 2004, **25**, 1605.
6. K. N. Luu, A. T. Phan, V. Kuryavyi, L. Lacroix, D. J. Patel, *J. Am. Chem. Soc.*, 2006, **128**, 9963.
